# Supplementary material
Source: Research Square preprint supplement (doi:10.21203/rs.3.rs-9663847/v1)
Supplement: Supplementary file 1 [file 43f709e4f4362170a2e27480.xlsx]

## Sheet: Supplementary Table S1
	Supplementary Table S1. Reagents information in this study.
	Name	Company	Catalog
	Cycloheximide (CHX)	Selleck	S7418
	MG132	Selleck	S2619
	Chloroquine (chlo)	Selleck	S6999
	Enzalutamide	MCE	HY-70002
	PMSF	Beyotime	ST506
	Antibody Dilution Buffer	ShareBio	SB-WB008

## Sheet: Supplementary Table S2
	Supplementary Table S2. siRNAs used in this study.
	siRNA	Sequence (5' to 3'): sense	Sequence (5' to 3'): antisense
	siNC（Negative Control）	UUCUCCGAACGUG-UCACGUTT	ACGUGACACGUUCG-GAGAATT
	siILF2	UAUCUUGCUUCUGAAAUAUTT	AUAUUUCAGAAGCAA-GAUAGC
	siAR	AAGAAGGCCAGUUGUAUGGAC	GUCCAUACAACUGGCCUUCUU
	siUSP7	ACCCUUGGACAAUAUUCCUTT	AGGAAUAUUGUCCAAGGGUTT
	These siRNA were purchased from GenePharma (Shanghai, China).

## Sheet: Supplementary Table S3
	Supplementary Table S3. Primers used in this study.
	Gene Name	Sequence (5' to 3'): sense	Sequence (5' to 3'): antisense
	GAPDH	GCACCGTCAAGGCTGAGAAC	TGGTGAAGACGCCAGTGGA
	ILF2	GGGGAACAAAGTCGTGGAAAG	CCAGTTTCGTTGGTCAGCA
	AR	AAGCAGGGATGACTCTGGGA	CTGGGTTGTCTCCTCAGTGG
	KLK3	GCCTGGATCTGAGAGAGATATCATC	ACACCTTTTTTTTTCTGGATTGTTG
	KLK2	CCATGCCTGGAGACATATCA	TCCAGCACATGTCACTCTCC
	TMPRSS2	GGTAAACTCTCCCTGCCACA	TACTCCAGGAAGTGGGGATG
	These siRNA were purchased from Carbotang Biotech (Jinan, China).

## Sheet: Supplementary Table S4
	Supplementary Table S4. Antibodies used in this study.
	Antibody Name	Company	catalog
	Rabbit monoclonal anti-ILF2 (1:1000 for WB)	HuaBio	ET7106-96
	Rabbit monoclonal anti-ILF2 (1:100 for Co-IP)	HuaBio	ET7106-96
	Rabbit monoclonal anti-ILF2 (1:100 for IHC)	HuaBio	ET7106-96
	Rabbit monoclonal anti-ILF2 (1:100 for IF)	HuaBio	ET7106-96
	Rabbit monoclonal anti-beta Tubulin (1:5000 for WB)	Abways	AB0039
	Rabbit monoclonal anti-AR (1:1000 for WB)	Cell Signaling Technology (CST)	5153
	Rabbit monoclonal anti-AR (1:100 for Co-IP)	Cell Signaling Technology (CST)	5153
	Rabbit monoclonal anti-AR (1:100 for IHC)	Cell Signaling Technology (CST)	5153
	Mouse monoclonal anti-AR (1:50 for IF)	Santa Cruz biotechnology	sc-7305
	Mouse polyclonal anti-USP7 (1:1000 for WB)	Proteintech	26948-1-AP
	Mouse polyclonal anti-USP7 (1:100 for Co-IP)	Proteintech	26948-1-AP
	Rabbit monoclonal anti-GAPDH (1:5000 for WB)	Abways	AB0037
	Rabbit monoclonal anti-LaminA/C (1:1000 for WB)	Abways	CY9727
	Normal mouse IgG	Santa Cruz biotechnology	sc-2025
	DYKDDDDK Tag (D6W5B) Rabbit mAb (1:1000 for WB)	Cell Signaling Technology (CST)	14793
	DYKDDDDK Tag (D6W5B) Rabbit mAb (1:100 for Co-IP)	Cell Signaling Technology (CST)	14793
	Mouse His-Tag Monoclonal antibody (1:5000 for WB)	Proteintech	66005-1-Ig
	Mouse His-Tag Monoclonal antibody (1:200 for Co-IP)	Proteintech	66005-1-Ig

## Sheet: Supplementary Table S5
	Supplementary Table S5. Gene list of androgen-induced Genes used for GSEA.
	HALLMARK_Androgen_Response gene sets and Nelson_Response_to_Androgen_Up_Signature were obtained from GSEA (http://software.broadinstitute.org/gsea/index.jsp).
	Androgen-induced gene sets were obtained from Zhang et al (19) in LNCaP cells stimulated with control or androgen.
	HALLMARK_Androgen_Response (100)	Androgen-induced genes (500)	NELSON_RESPONSE_TO_ANDROGEN_UP (83)
	ABCC4	STEAP4	ABCC4
	ABHD2	BC062780	ABHD2
	ACSL3	THC2663779	ACSL3
	ACTN1	LOX	ACTN1
	ADAMTS1	HPGD	ADAMTS1
	ADRM1	MOGAT2	ADRM1
	AKAP12	ANGPT2	AKAP12
	AKT1	BQ323779	ALDH1A3
	ALDH1A3	BG618474	APPBP2
	ANKH	LOC730498	AZGP1
	APPBP2	LOX	B2M
	ARID5B	LOX	B4GALT1
	AZGP1	EMP1	C1orf21
	B2M	KIAA1822L	CAMKK2
	B4GALT1	LOX	CDC14B
	BMPR1B	HPGD	CPD
	CAMKK2	SLC38A4	DBI
	CCND1	TBX15	DCTN3
	CCND3	LOX	DHCR24
	CDC14B	MYBPC1	DNAJB9
	CDK6	LAMA1	ELL2
	CENPN	FKBP5	ELOVL5
	DBI	LOX	FKBP5
	DHCR24	ORM1	GSR
	DNAJB9	LOX	GUCY1A1
	ELK4	A_24_P174353	H1-0
	ELL2	PTGER4	HERC3
	ELOVL5	ChGn	HES6
	FADS1	CENPN	HMGCS1
	FKBP5	AGR2	HOMER2
	GNAI3	F5	HPGD
	GPD1L	F5	HSD17B14
	GSR	F5	ID2
	GUCY1A1	SNAI2	IDI1
	H1-0	SLC2A14	INPP4B
	HERC3	PTGER4	IQGAP2
	HMGCR	F5	ITGAV
	HMGCS1	TMEM100	KLF4
	HOMER2	F5	KLK2
	HPGD	TRIM48	KLK3
	HSD17B14	F5	KLK4
	IDI1	ORM2	KRT19
	INPP4B	F5	KRT8
	INSIG1	LOX	LIFR
	IQGAP2	CXCR4	LMAN1
	ITGAV	CXCR4	MAF
	KLK2	CXCR4	MYL12A
	KLK3	LOC642569	NDRG1
	KRT19	CXCR4	NKX3-1
	KRT8	CXCR4	ORM2
	LIFR	AK093002	PALM2AKAP2
	LMAN1	CXCR4	PDLIM5
	MAF	TRIM63	PGM3
	MAK	F5	PHYH
	MAP7	GNE	PIAS1
	MERTK	CXCR4	PLPP1
	MYL12A	S100P	PMEPA1
	NCOA4	DBI	PTPN21
	NDRG1	ANK1	RAB4A
	NGLY1	PTN	RBM10
	NKX3-1	THC2541714	SAT1
	PA2G4	ChGn	SCD
	PDLIM5	TMCC3	SEC24D
	PGM3	H2-ALPHA	SELENOP
	PIAS1	F5	SGK1
	PLPP1	CXCR4	SLC26A2
	PMEPA1	RNF148	SLC38A2
	PTK2B	CXCR4	SMS
	PTPN21	LOX	SNAP25
	RAB4A	CXCR4	SORD
	RPS6KA3	THC2632909	SPDEF
	RRP12	SGK	SRP19
	SAT1	MAF	STEAP4
	SCD	SPOCK1	STK39
	SEC24D	CTBP1	TMPRSS2
	SELENOP	ST6GALNAC1	TNFAIP8
	SGK1	TRPM8	TPD52
	SLC26A2	FHL2	TSC22D1
	SLC38A2	TG	UAP1
	SMS	TARP	UGDH
	SORD	LOX	UNC13B
	SPCS3	C1orf113	VAPA
	SPDEF	F5	ZBTB10
	SRF	AA573434
	SRP19	TMCC3
	STEAP4	WWTR1
	STK39	ATP1A2
	TMEM50A	LRCH1
	TMPRSS2	LAT2
	TNFAIP8	SLC45A3
	TPD52	TMEPAI
	TSC22D1	F5
	UAP1	ELOVL7
	UBE2I	THC2626078
	UBE2J1	MAK
	VAPA	IL10RB
	XRCC5	BG462058
	XRCC6	FZD5
	ZBTB10	AW993939
	ZMIZ1	CECR6
		AF349445
		TMPRSS2
		DOCK8
		RHOU
		KLK3
		UGT2B28
		SLC26A3
		MYH7
		CUTL2
		CLDN8
		MAK
		KLK2
		C16orf30
		DOCK11
		SLC2A3
		GDF15
		ACSL3
		AF052146
		CSRP2
		ADAM7
		INPP4B
		CENPN
		SLC16A6
		ANGPT2
		FZD5
		PHLDB2
		AI570240
		ACTG2
		ERRFI1
		WISP1
		MOGAT2
		SNCA
		RHOU
		AW029229
		SNCA
		ELL2
		ANKRD37
		LIFR
		AW994273
		SORD
		HMGCS1
		SNCA
		MSMB
		RUNX1
		GNMT
		FOXG1B
		SLC38A4
		ENST00000362001
		ELOVL7
		MBOAT2
		SNCA
		TGM2
		KLK3
		CNTNAP2
		THC2668435
		MPZL1
		AI207522
		AK130514
		TM4SF1
		KLK12
		AY358224
		WIPI1
		PLA2G5
		KRT19
		PGC
		CDK6
		ERRFI1
		ABCC4
		SNCA
		PPAP2A
		NKX3-1
		NNMT
		KLF12
		NPPC
		KLK2
		NBL1
		AF090920
		C10orf110
		UGT2B4
		SNCA
		CBLL1
		AF116616
		FLJ39502
		BC039021
		CADPS2
		SNCA
		EDG7
		MERTK
		PTPN21
		KRT18
		FKBP5
		DHCR24
		SNCA
		ADH1C
		THC2788875
		FZD5
		ATP8A2
		BC031250
		PNLIP
		SNCA
		DHCR24
		SNCA
		ATAD2
		THC2539939
		TNFAIP3
		ATAD2
		NR4A1
		STK17B
		ATAD2
		ATAD2
		BI710972
		IGSF4D
		BHLHB8
		DKFZp761P0423
		ATAD2
		PLOD2
		LCK
		GRIN3A
		C3orf58
		STK39
		ATAD2
		C3orf15
		AI570094
		AKAP12
		STK39
		PVRL3
		MGC16703
		ANKH
		LOC643652
		NDRG1
		ATAD2
		SAT1
		INSIG1
		PTCRA
		LOC731190
		MTMR9
		SAT1
		EAF2
		SLC35F2
		FADS1
		KIAA1656
		KIAA1822L
		CHRNA2
		ATAD2
		ATAD2
		AK095225
		HSD17B2
		SPCS3
		ATAD2
		SLC15A2
		LOC643637
		PAK1IP1
		ODC1
		SLA
		ADIPOQ
		BE766438
		ANKH
		FLJ40722
		TM4SF18
		BC018675
		PAK1IP1
		FGFR3
		PFKFB2
		EDG7
		FADS2
		TMEPAI
		PTPRN2
		LDLR
		NCAPD3
		FASN
		SLC41A1
		SCD
		A_24_P715434
		PAK1IP1
		TMPRSS11E
		PAK1IP1
		BQ448507
		RFPL1S
		THC2669092
		LMAN1
		SMS
		PAK1IP1
		A_24_P931175
		AQP10
		PAK1IP1
		UBE2J1
		FZD8
		C1orf21
		IGF1R
		WFDC5
		PPFIBP1
		PTN
		SLC16A6
		PAK1IP1
		PAK1IP1
		LRP4
		THC2764011
		CENTG1
		LONRF1
		PAK1IP1
		ATP10A
		AMD1
		LOC390472
		SCD
		ENST00000266661
		ELL2
		ANXA1
		C9orf61
		KRT8
		T35134
		PPP1R3C
		APLN
		APLN
		BRP44
		THC2641682
		AK125648
		GLRX2
		AI051172
		ABCC4
		ALS2CR2
		THC2637492
		CR603437
		ANKH
		SQLE
		PAK1IP1
		ARG1
		IFI6
		A_24_P890995
		BI836739
		LOC388889
		KRT18
		FNDC3B
		INPP4B
		EDG7
		SDR-O
		THSD7A
		SYT9
		THC2783023
		NANOGP1
		CORO2A
		LOC344320
		IGF1R
		PVRL3
		BC018589
		C1orf186
		UGT1A6
		CENPN
		BC015836
		KCNMA1
		AK092594
		BCMP11
		AIM1
		C1orf21
		SC4MOL
		AY429544
		SPDYA
		UCHL1
		DUSP27
		COL12A1
		FAM129A
		DFNB31
		TACSTD2
		MYCL1
		A_24_P922440
		BRP44
		C5orf29
		SPAG17
		OR7E47P
		PGC
		THC2755690
		LOC731274
		LONRF1
		ANKRD29
		CYP4F12
		LAT2
		MCCC2
		DQ168992
		LOC440040
		FAM105A
		SLC2A4
		FLJ40432
		AL713762
		AK021467
		ATRNL1
		KLF4
		FABP5
		SPTB
		C6orf206
		FAM26C
		ALDH1A3
		A_24_P844100
		LCK
		ADARB2
		LRIG1
		LOC89944
		PEAR1
		LOC399956
		HOMER2
		LOC401393
		KRT8
		LIFR
		ACSL3
		ERO1L
		OR2W3
		CTNNA2
		PHF8
		FAM105B
		MBOAT2
		SIGLEC5
		BM982777
		TPD52L3
		CA414006
		MALT1
		SLC22A3
		SLC43A1
		A_24_P281605
		AJ519285
		LOC643447
		DCHS2
		TGFB2
		RAB3B
		LOC132205
		SEC24A
		THC2531204
		BF063428
		LOC646282
		KLF15
		IGF1R
		TBRG1
		IL20RA
		FAM19A4
		SDK1
		KCNMA1
		RFXDC1
		THC2724046
		LOC342732
		PPP1CB
		C12orf42
		ZBTB24
		ST8SIA2
		A_24_P940354
		HMGCS1
		SMS
		SERPIND1
		IRS2
		NNT
		PGM3
		LOC392479
		BMPR1B
		NDRG1
		POLE
		LCK
		FKSG83
		LOC649344
		ARSG
		BG205572
		LONRF1
		PRKCH
		SORD
		BQ017638
		AF116620
		GNB4
		ENST00000340455
		SORD
		ABCC4
		LOC652524
		THC2611277
		AI359819
		SPARCL1
		ACAD8
		LSS
		LOC649233
		LOC344595
		IGF1R
		A_24_P7750
		TGM2
		BX113452
		SERPIND1
		SHROOM3
		MTMR9
		ERN1
		FDFT1
		PPP1CB
		AY358236
		ECSM2
		MICAL1
		AA334114
		DEFB129
		LCK
		SNX25
		VLDLR
		CUTL2
		LOC402429
		MGC14376
		BCAP29
		A_32_P142521
		KIAA1913
		HSPA2
		SLC41A1
		ENST00000358356
