# Supplementary material
Source: Research Square preprint supplement (doi:10.21203/rs.3.rs-9663847/v1)
Supplement: Supplementary file 1 [file f82f6f66080f212ce7f6788c.docx]

**Supplementary Materials and Methods**

**Cell proliferation, colony formation, migration and invasion assays**

Cell proliferation was evaluated using the CCK8 assay (ShareBio, catalog SB-CCK8) according to the manufacturer’s instructions. Briefly, 10 μL of CCK8 solution was added to each well containing 100 μL of culture medium. After incubation at 37°C for 1-2 hours, absorbance was measured at 450 nm using a microplate reader.

Colony formation assays were conducted by seeding PCa cells in 6-well plates. After two weeks of culture under standard conditions, the cells were fixed with 4% paraformaldehyde for 15 minutes and stained with 1% crystal violet for 20 minutes. Excess stain was washed off with distilled water, and the plates were air-dried before imaging and manual counting.

Migration and invasion assays were performed using Transwell chambers (Corning, catalog 3422) with an 8 μm pore size membrane. For migration assays, 600 μL of culture medium containing 10% fetal bovine serum (FBS) was added to the lower chamber as a migration stimulant. In the upper chamber, 200 μL of serum-free cell suspension (5×10⁵ cells per chamber) was seeded. After incubation for 24 hours at 37°C, non-migrated cells on the upper surface of the membrane were removed with a cotton swab. Migrated cells adhering to the lower surface were fixed with 4% paraformaldehyde, stained with 1% crystal violet, and counted under a microscope in five randomly selected fields. For invasion assays, the procedure was identical to the migration assay except that the upper chamber was pre-coated with Matrigel (Corning) to mimic the extracellular matrix.

**Nuclear and cytoplasmic fractionation**

The fractionation was conducted using a Nuclear and Cytoplasmic Protein Extraction Kit (Beyotime, catalog P0027) in accordance with the manufacturer’s instructions. Briefly, LNCaP cells were seeded in 6 cm culture dishes and subjected to appropriate experimental treatments. After treatment, cells were harvested, and nuclear and cytoplasmic protein fractions were isolated through sequential lysis and centrifugation. GAPDH and Lamin A/C were used as loading controls for the cytoplasmic and nuclear fractions, respectively.
